# Supplementary material for: Eating disorder symptoms in Brazilian university students: a systematic review and meta-analysis
Source: PubMed Central journal article supplement — Braz J Psychiatry. 2018 Oct 11;41(2):179–87. doi: 10.1590/1516-4446-2018-0014 (PMC6781688; doi:10.1590/1516-4446-2018-0014), 2018-10-11

## Appendix 1

### Review question

1. Are Brazilian university students at higher risk of eating disorders (ED) symptoms than the general population?
2. Is there a specific university major/area of study related to a greater number of students at higher risk of ED?
3. Is there a region of Brazil in which university students are at higher risk of ED?

### Searches

- We will conduct a systematic review using three electronic databases (SciELO, LILACS and PubMed) and analyze all studies published until July 2017.
- The search terms were selected from MeSH (Medical Subject Headings): "anorexia", anorexia nervosa", "bulimia", "bulimia nervosa", "binge eating disorders", "BED" - correlated to - university", universities", "college", , "student", "undergraduate", academic", "scholar" and DeCS (Descritores em Ciência da Saúde): "anorexia nervosa", "bulimia nervosa", "transtorno da compulsão alimentar"- correlated to – "estudantes", "universidade".
- We first developed a search strategy for PubMed/MEDLINE, which was subsequently adapted for the other databases – including the use of Portuguese terms.
- We intend to include studies conducted in Brazil and published in English, Portuguese or Spanish.
- The reference lists of all included articles will be also hand searched to check for other relevant studies and, if necessary, a grey literature search will be conducted by requesting unpublished scientific works from their authors.

### Types of study to be included

#### Inclusion criteria:

- We will include cross-sectional or follow-up studies with a sample of Brazilian university students who completed an eating disorder and/or body image assessment with a validated research instrument (such as self-administered questionnaire and/or a semi-structured interview).

#### Exclusion criteria:

- We will exclude studies that used a non-validated tool or an incomplete version of a validated instrument (e.g. applying only some of the items). Questionnaire validation studies will be also excluded.

### Condition or domain being studied

We are interested in studying the mental health of Brazilian university students with respect to eating disorder symptoms (e.g. disordered eating behavior or body image dissatisfaction) that have been assessed through questionnaires.

### **Participants/population**

Students enrolled in Brazilian universities.

### **Intervention(s), exposure(s)**

The exposure of interest for this study is the university environment and stressors associated with being a college student.

### **Comparator(s)/control**

Controlled by age/gender, individuals not enrolled in a university.

### **Primary outcome(s)**

The main outcome measure will be the percentage of Brazilian university students with ED symptoms and the rates according to major/area of study and region of Brazil.

### **Secondary outcome(s)**

Data quality and reliability, literature gaps

### **Risk of bias (quality) assessment**

- Two authors will independently perform each search step. Disagreements regarding inclusion will be discussed with the other authors until a consensus is reached.
- The Newcastle-Ottawa Scale will be used for assessing the quality of all studies included in the review.
- The studies included in the meta-analysis will be assessed for heterogeneity and publication bias.

### **Strategy for data synthesis**

- The results will be described narratively.
- If there is sufficient data, we will conduct a meta-analysis using Comprehensive meta-analysis software v.3.
- Heterogeneity of the studies will be analyzed using the Q and I<sup>2</sup> statistics. If high heterogeneity is detected across studies in the meta-analysis, a random-effects model will be used.
- Publication bias will be analyzed with a visual inspection of funnel plots.
- Egger's test will be applied and forest plots will be made available.
- Finally, if there is significant heterogeneity, we will conduct a meta-regression wherever possible to determine whether moderators account for effect size variance. At least 10 studies per group will be the minimum threshold for this procedure.

### **Analysis of subgroups or subsets**

- If there is significant heterogeneity, we will conduct a meta-regression procedure wherever possible to determine whether moderators account for

effect size variance. At least 10 studies per group will be the minimum threshold for this procedure.

#### **Contact details for further information**

Professor Bruno Palazzo Nazar

[bruno.nazar@gmail.com](mailto:bruno.nazar@gmail.com)

Dra Amanda Pompeu Trindade

[amandatrindade7@hotmail.com](mailto:amandatrindade7@hotmail.com)

#### **Organizational affiliation of the review**

GOTA – Obesity and Eating Disorders Group – Institute of Psychiatry from the Federal University of Rio de Janeiro/State Institute of Diabetes and Endocrinology, Rio de Janeiro, Brazil

#### **Review team members and their organizational affiliations**

Dr Amanda Pompeu Trindade : GOTA – Obesity and Eating Disorders Group – Institute of Psychiatry from the Federal University of Rio de Janeiro, Brazil

Professor Jose Carlos Appolinario: GOTA – Obesity and Eating Disorders Group – Institute of Psychiatry from the Federal University of Rio de Janeiro, Brazil

Professor Paulo Mattos: D'Or Institute for Research and Education, Rio de Janeiro, Brazil

Professor Janet Treasure: King's College London, Institute of Psychiatry, Psychology & Neuroscience, Department of Psychological Medicine, Section of Eating Disorders, London, UK

Professor Bruno Palazzo Nazar: GOTA – Obesity and Eating Disorders Group – Institute of Psychiatry from the Federal University of Rio de Janeiro, Brazil

#### **Anticipated or actual start date**

April 2017

#### **Anticipated completion date**

September 2017

#### **Funding sources/sponsors**

None.

#### **Conflicts of interest**

None.

#### **Language**

English

#### **Country**

Brazil

**Table S1** Newcastle-Ottawa Quality Assessment (adapted for cross sectional studies) results for each article included in the systematic review – Selection Domain.

| Author, Year                         | Selection                        |             |                 |                                             | Total / Quality rating |
|--------------------------------------|----------------------------------|-------------|-----------------|---------------------------------------------|------------------------|
|                                      | Representativeness of the sample | Sample size | Non-respondents | Ascertainment of the exposure (risk factor) |                        |
| Alberton et al., 2013 <sup>26</sup>  | *                                | -           | -               | **                                          | 3 / Good               |
| Alvarenga et al., 2010 <sup>27</sup> | *                                | -           | -               | **                                          | 3 / Good               |
| Alvarenga et al., 2011 <sup>28</sup> | *                                | *           | -               | **                                          | 4 / Good               |
| Alvarenga et al., 2013 <sup>29</sup> | *                                | -           | -               | **                                          | 3 / Good               |
| Bosi et al., 2006 <sup>30</sup>      | *                                | *           | -               | **                                          | 4 / Good               |
| Bosi et al., 2008 <sup>31</sup>      | *                                | -           | -               | **                                          | 3 / Good               |
| Bosi et al., 2009 <sup>32</sup>      | *                                | *           | -               | **                                          | 4 / Good               |
| Bosi et al., 2014 <sup>33</sup>      | *                                | *           | -               | **                                          | 4 / Good               |
| Cenci et al., 2009 <sup>34</sup>     | *                                | *           | -               | **                                          | 4 / Good               |
| Costa et al., 2010 <sup>36</sup>     | *                                | *           | -               | **                                          | 4 / Good               |
| Ferrari et al., 2012 <sup>37</sup>   | *                                | *           | -               | **                                          | 4 / Good               |
| Fiates et al., 2001 <sup>38</sup>    | *                                | -           | -               | **                                          | 3 / Good               |
| Frank et al., 2016 <sup>39</sup>     | *                                | -           | -               | **                                          | 3 / Good               |
| Garcia et al., 2010 <sup>40</sup>    | *                                | -           | -               | **                                          | 3 / Good               |
| Gonçalves et al., 2008 <sup>41</sup> | *                                | -           | -               | **                                          | 3 / Good               |
| Kirsten et al., 2009 <sup>42</sup>   | *                                | -           | -               | **                                          | 3 / Good               |
| Laus et al., 2009 <sup>43</sup>      | *                                | -           | -               | **                                          | 3 / Good               |
| Legnani et al., 2012 <sup>44</sup>   | *                                | -           | -               | **                                          | 3 / Good               |
| Martins et al., 2015 <sup>45</sup>   | *                                | -           | -               | **                                          | 3 / Good               |
| Miranda et al., 2012 <sup>46</sup>   | *                                | *           | -               | **                                          | 4 / Good               |
| Nicoli et al., 2011 <sup>47</sup>    | *                                | -           | -               | **                                          | 3 / Good               |
| Penz et al., 2008 <sup>48</sup>      | *                                | -           | -               | **                                          | 3 / Good               |
| Pereira et al., 2011 <sup>49</sup>   | *                                | -           | -               | **                                          | 3 / Good               |
| Pinto et al., 2009 <sup>50</sup>     | *                                | -           | -               | **                                          | 3 / Good               |
| Quadros et al., 2010 <sup>51</sup>   | *                                | -           | -               | **                                          | 3 / Good               |
| Rech et al., 2010 <sup>52</sup>      | *                                | -           | -               | **                                          | 3 / Good               |
| Santos et al., 2008 <sup>53</sup>    | *                                | -           | -               | **                                          | 3 / Good               |

| Author, Year                      | Selection                        |             |                 |                                             | Total / Quality rating |
|-----------------------------------|----------------------------------|-------------|-----------------|---------------------------------------------|------------------------|
|                                   | Representativeness of the sample | Sample size | Non-respondents | Ascertainment of the exposure (risk factor) |                        |
| Silva et al., 2012 <sup>54</sup>  | *                                | -           | -               | **                                          | 3 / Good               |
| Souza et al., 2002 <sup>55</sup>  | *                                | -           | -               | **                                          | 3 / Good               |
| Stipp et al., 2003 <sup>57</sup>  | *                                | -           | -               | **                                          | 3 / Good               |
| Vitolo et al., 2006 <sup>58</sup> | *                                | *           | -               | **                                          | 4 / Good               |

**Table S2** Newcastle-Ottawa Quality Assessment (adapted for cross sectional studies) results for each article included in the systematic review – Comparability and Outcome domains.

| Author, Year                         | Comparability          |                           | Outcome          |                        |          |
|--------------------------------------|------------------------|---------------------------|------------------|------------------------|----------|
|                                      | Total / Quality Rating | Assessment of the outcome | Statistical test | Total / Quality Rating |          |
| Alberston et al., 2013 <sup>26</sup> | **                     | 2 / Good                  | *                | -                      | 1 / Poor |
| Alvarenga et al., 2010 <sup>27</sup> | *                      | 1 / Fair                  | *                | *                      | 2 / Fair |
| Alvarenga et al., 2011 <sup>28</sup> | *                      | 1 / Fair                  | *                | *                      | 2 / Fair |
| Alvarenga et al., 2013 <sup>29</sup> | *                      | 1 / Fair                  | *                | *                      | 2 / Fair |
| Bosi et al., 2006 <sup>30</sup>      | *                      | 1 / Fair                  | *                | -                      | 1/Poor   |
| Bosi et al., 2008 <sup>31</sup>      | *                      | 1 / Fair                  | *                | *                      | 2/Fair   |
| Bosi et al., 2009 <sup>32</sup>      | *                      | 1 / Fair                  | *                | *                      | 2/Fair   |
| Bosi et al., 2014 <sup>33</sup>      | *                      | 1 / Fair                  | *                | *                      | 2/Fair   |
| Cenci et al., 2009 <sup>34</sup>     | *                      | 1 / Fair                  | *                | *                      | 2/Fair   |
| Costa et al., 2010 <sup>36</sup>     | *                      | 1 / Fair                  | *                | *                      | 2/Fair   |
| Ferrari et al., 2012 <sup>37</sup>   | **                     | 2 / Good                  | *                | -                      | 1/Poor   |
| Fiates et al., 2001 <sup>38</sup>    | *                      | 1 / Fair                  | *                | -                      | 1/Poor   |
| Frank et al., 2016 <sup>39</sup>     | **                     | 2 / Good                  | *                | -                      | 1/Poor   |
| Garcia et al., 2010 <sup>40</sup>    | *                      | 1 / Fair                  | *                | -                      | 1/Poor   |
| Gonçalves et al., 2008 <sup>41</sup> | **                     | 2 / Good                  | *                | *                      | 2/Fair   |
| Kirsten et al., 2009 <sup>42</sup>   | *                      | 1 / Fair                  | *                | -                      | 1/Poor   |
| Laus et al., 2009 <sup>43</sup>      | *                      | 1 / Fair                  | *                | -                      | 1/Poor   |
| Legnani et al., 2012 <sup>44</sup>   | **                     | 2 / Good                  | *                | -                      | 1/Poor   |

| Author, Year                       | Comparability          |                           | Outcome          |                        |        |
|------------------------------------|------------------------|---------------------------|------------------|------------------------|--------|
|                                    | Total / Quality Rating | Assessment of the outcome | Statistical test | Total / Quality Rating |        |
| Martins et al., 2015 <sup>45</sup> | **                     | 2 / Good                  | *                | -                      | 1/Poor |
| Miranda et al., 2012 <sup>46</sup> | **                     | 2 / Good                  | *                | -                      | 1/Poor |
| Nicoli et al., 2011 <sup>47</sup>  | *                      | 1 / Fair                  | *                | -                      | 1/Poor |
| Penz et al., 2008 <sup>48</sup>    | -                      | 0 / Poor                  | *                | -                      | 1/Poor |
| Pereira et al., 2011 <sup>49</sup> | *                      | 1 / Fair                  | *                | -                      | 1/Poor |
| Pinto et al., 2009 <sup>50</sup>   | *                      | 1 / Fair                  | *                | -                      | 1/Poor |
| Quadros et al., 2010 <sup>51</sup> | **                     | 2 / Good                  | *                | -                      | 1/Poor |
| Rech et al., 2010 <sup>52</sup>    | **                     | 2 / Good                  | *                | -                      | 1/Poor |
| Santos et al., 2008 <sup>53</sup>  | *                      | 1 / Fair                  | *                | -                      | 1/Poor |
| Silva et al., 2012 <sup>54</sup>   | *                      | 1 / Fair                  | *                | -                      | 1/Poor |
| Souza et al., 2002 <sup>55</sup>   | *                      | 1 / Fair                  | *                | -                      | 1/Poor |
| Stipp et al., 2003 <sup>57</sup>   | *                      | 1 / Fair                  | *                | -                      | 1/Poor |
| Vitolo et al., 2006 <sup>58</sup>  | *                      | 1 / Fair                  | *                | -                      | 1/Poor |

**Table S3** Prevalence of positive Bulimic Investigatory Test, Edinburgh (BITE) screening - symptom subscale in Brazilian university students (by major).

| Article                    | Sample Size | High score         | Cutoff point | Moderate score      | Cutoff point  |
|----------------------------|-------------|--------------------|--------------|---------------------|---------------|
| <b>Medicine</b>            |             |                    |              |                     |               |
| Souza et al. <sup>55</sup> | 199         | 350%               | ≥ 20         | 23.10%              | From 10 to 19 |
| Pinto et al. <sup>50</sup> | 85 (46+39)  | 4.8% (2.2% + 2.6%) | ≥ 20         | 78.8% (32.6 + 46.2) | From 10 to 19 |
| Bosi et al. <sup>33</sup>  | 189         | 6.30%              | ≥ 20         | 31.70%              | From 10 to 19 |
| <b>Sports Science</b>      |             |                    |              |                     |               |
| Bosi et al. <sup>31</sup>  | 191         | 0%                 | ≥ 20         | 24.60%              | From 10 to 19 |
| <b>Psychology</b>          |             |                    |              |                     |               |
| Bosi et al. <sup>32</sup>  | 175         | 5%                 | ≥ 20         | 20.80%              | From 10 to 19 |
| <b>N/A</b>                 |             |                    |              |                     |               |
| Cenci et al. <sup>34</sup> | 220         | 3.6%               | ≥ 20         | 32.7                | From 10 to 19 |

N/A = not available.

**Table S4** Prevalence of positive Bulimic Investigatory Test, Edinburgh (BITE) severity subscale in Brazilian university students (by major)

| Article                    | Sample size | High score | Cutoff point | Moderate score | Cutoff point |
|----------------------------|-------------|------------|--------------|----------------|--------------|
| <b>Medicine</b>            |             |            |              |                |              |
| Souza et al. <sup>55</sup> | 199         | 2%         | ≥ 10         | 2%             | From 5 to 9  |
| Pinto et al. <sup>50</sup> | 46          | 6.5%       | ≥ 10         | 8.7%           | From 5 to 9  |
| Pinto et al. <sup>50</sup> | 39          | 10.3%      | ≥ 10         | 23.1%          | From 5 to 9  |
| Bosi et al. <sup>33</sup>  | 189         | 1.60%      | ≥ 10         | 6.30%          | From 5 to 9  |
| <b>Sports Science</b>      |             |            |              |                |              |
| Bosi et al. <sup>31</sup>  | 191         | 2.60%      | ≥ 10         | 4.70%          | From 5 to 9  |
| <b>Psychology</b>          |             |            |              |                |              |
| Bosi et al. <sup>32</sup>  | 175         | 5%         | ≥ 10         | 2.60%          | From 5 to 9  |

**Table S5** Prevalence of positive Body Shape Questionnaire (BSQ) in Brazilian university students (by major).

Legend: N/A = not available. \*Total result from Souza 2011 included mild cases.

| Article                      | Sample size | High  | Cutoff point | Moderate | Cutoff point    | Total (Severe + moderate cases) |
|------------------------------|-------------|-------|--------------|----------|-----------------|---------------------------------|
| <b>Nutrition</b>             |             |       |              |          |                 |                                 |
| Laus et al. <sup>43</sup>    | 24          | 25%   | > 110        | 21%      | From 91 to 110  | 46%                             |
| Stipp et al. <sup>57</sup>   | 104         | 6.70% | ≥ 141        | 10.60%   | From 111 to 140 | 17.30%                          |
| Bosi et al. <sup>30</sup>    | 193         | 6.20% | ≥ 140        | 12.40%   | From 111 to 140 | 18.60%                          |
| Silva et al. <sup>54</sup>   | 175         | 5.70% | > 140        | 8%       | From 111 to 140 | 13.70%                          |
| <b>Sports science</b>        |             |       |              |          |                 |                                 |
| Laus et al. <sup>43</sup>    |             | 16%   | > 110        | 30%      | From 91 to 110  | 46%                             |
| Garcia et al. <sup>40</sup>  | 96          | 1%    | > 140        | 8.30%    | From 111 to 140 | 9%                              |
| Legnani et al. <sup>44</sup> | 229         | N/A   | ≥ 140        | N/A      | From 111 to 140 | 8.60%                           |
| Bosi et al. <sup>31</sup>    | 191         |       | ≥ 140        |          | From 111 to 140 | 17%                             |
| <b>Psychology</b>            |             |       |              |          |                 |                                 |
| Stipp et al. <sup>57</sup>   | 135         | 3%    | ≥ 141        | 19.20%   | From 111 to 140 | 23%                             |

| Article                     | Sample size | High   | Cutoff point | Moderate | Cutoff point    | Total (Severe + moderate cases) |
|-----------------------------|-------------|--------|--------------|----------|-----------------|---------------------------------|
| Bosi et al. <sup>32</sup>   | 175         | 9.70%  | ≥ 140        | 9.70%    | From 111 to 140 | 19.40%                          |
| <b>Medicine</b>             |             |        |              |          |                 |                                 |
| Garcia et al. <sup>40</sup> | 98          | 9.20%  | > 140        | 10.20%   | From 111 to 140 | 19.40%                          |
| Bosi et al. <sup>33</sup>   | 189         | 17.60% | > 140        | 10.10%   | From 111 to 140 | 27.70%                          |
| <b>Marketing</b>            |             |        |              |          |                 |                                 |
| Laus et al. <sup>43</sup>   | 32          | 28%    | > 110        | 3%       | From 91 to 110  | 31%                             |
| <b>Management</b>           |             |        |              |          |                 |                                 |
| Laus et al. <sup>43</sup>   | 34          | 26%    | > 110        | 9%       | From 91 to 110  | 35%                             |
| <b>N/A</b>                  |             |        |              |          |                 |                                 |
| Cenci et al. <sup>34</sup>  | 220         | 4.5%   | N/A          | 15.5%    | N/A             | 20%                             |
| Costa et al. <sup>36</sup>  | 220         | 4.5%   | ≥ 141        | 15.5%    | From 111 to 140 | 20%                             |
| Souza et al. <sup>56</sup>  | 352         | N/A    | ≥ 140        | N/A      | From 111 to 140 | 46.7%*                          |

**Figure S1** Forest plot of positive screening rates in studies using the Eating Attitudes Test (EAT-26) (cutoff point ≥ 20).

95% CI = 95% confidence interval.

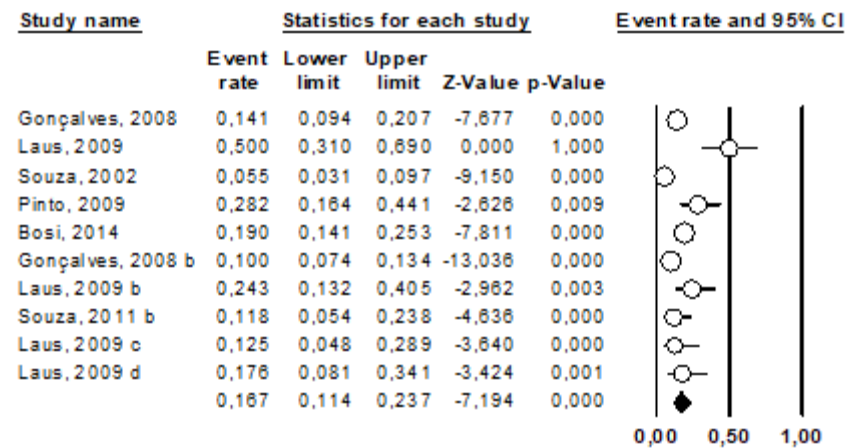



**Figure S2** Funnel plot of studies using the EAT-26 (cutoff  $\geq 20$  points)

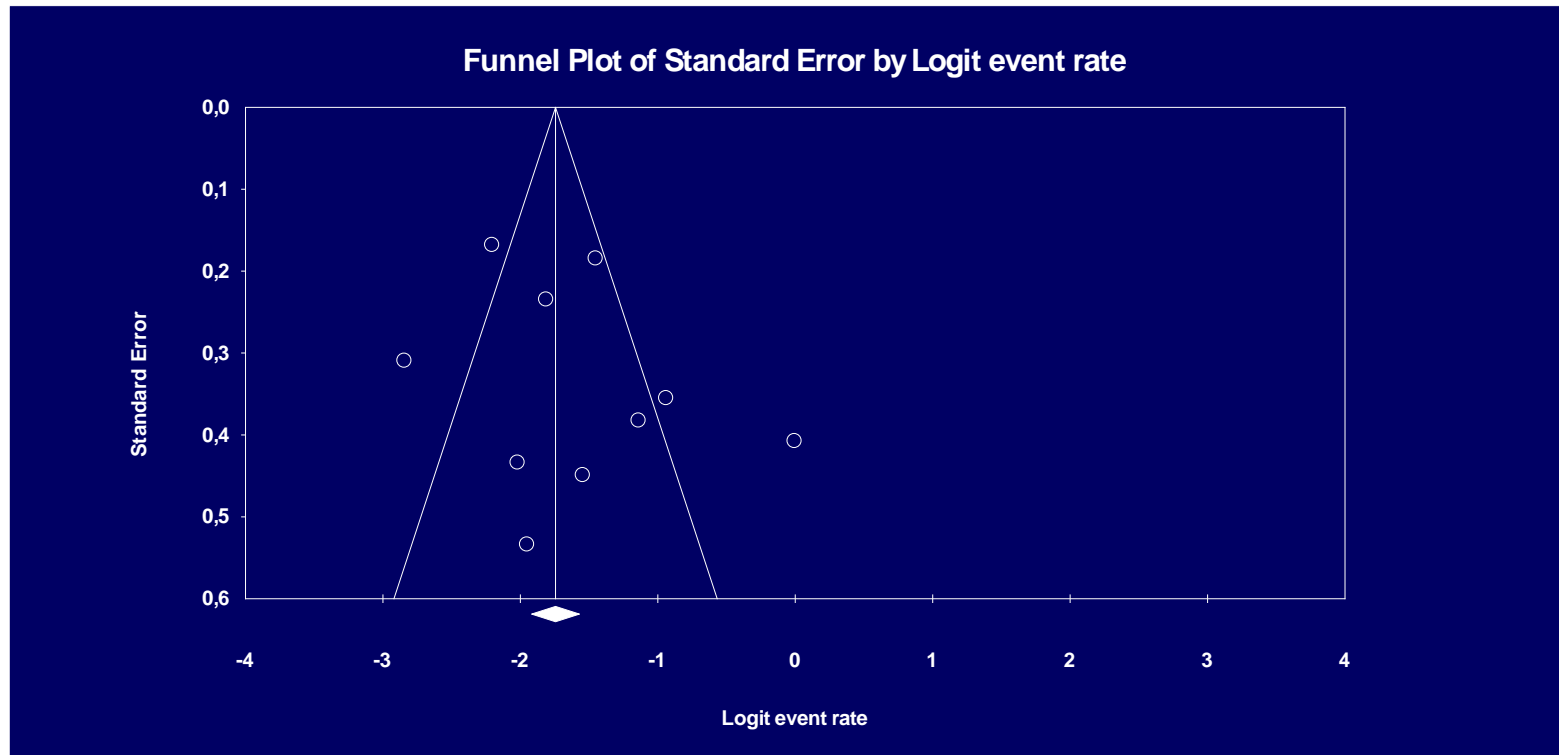

**Figure S3** Funnel plot of studies using the EAT-26 (cutoff  $\geq 21$  points)

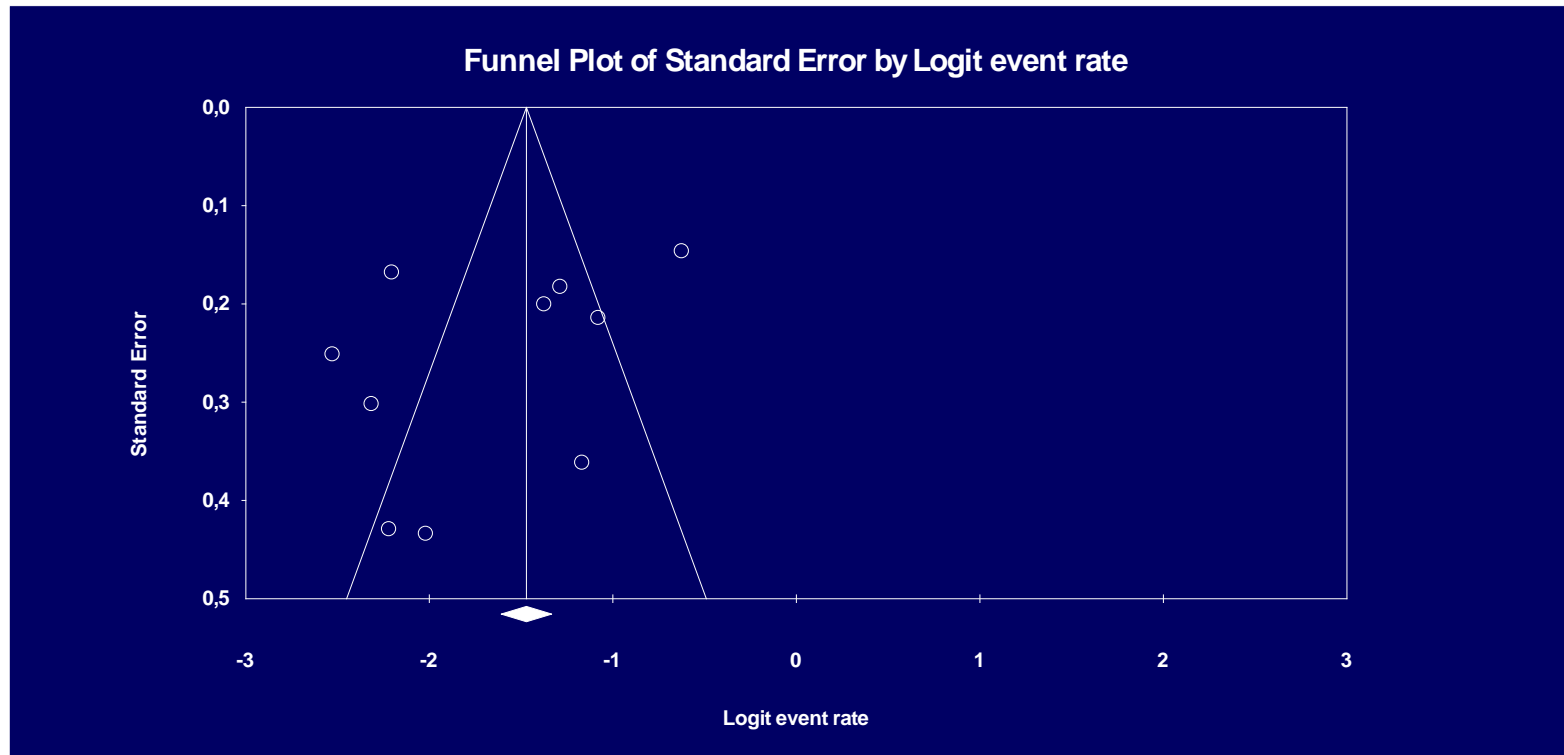

Supplement: bjp-41-02-179-s001.pdf [file bjp-41-02-179-s001.pdf]
